# Supplementary material
Source: publisher site journal article supplement (https://www.dovepress.com/get_supplementary_file.php?f=210598.docx)
Supplement: Supplementary file 1 [file get_supplementary_file.php]

**Supplemental methods****: 1-D 1H-NMR spectra acquisition protocol**

The pH value of each sample was adjusted to a range 7.0±0.5. Calcium formate (6.164mM) was added to each sample used as an internal standard. The one-dimensional (1-D) 1H-NMR spectrum of each serum sample was acquired at the NMR Core Laboratory at the University of Michigan on an Agilent (formerly Varian, Agilent Inc., Santa Clara, CA, USA) 11.74 Tesla (500 MHz) NMR spectrometer equipped with a 5mm Agilent “One-probe”. Proton spectra were recorded using 32 scans of the first increment of a 1H,1H-NOESY (commonly called a 1D-NOESY or METNOESY) pulse sequence. Spectra were acquired at a room temperature of 295 ± 0.3K. The NMR pulse sequence was as follows: a recovery delay of 1s, a 990ms saturation pulse empirically centered on the water resonance, two calibrated 90° pulses, a mixing time of 100ms, a final 90° pulse, and an acquisition period of 4s. Optimal pulse widths were calibrated using an array of pulse widths to measure the 360° pulse null for water and dividing by four to acquire optimum 90°pulse as previously described (1).

Cited References:

1. Lacy P, McKay RT, Finkel M, Karnovsky A, Woehler S, Lewis MJ, Chang D, Stringer KA. Signal intensities derived from different NMR probes and parameters contribute to variations in quantification of metabolites. PLoS One. 2014;9(1):e85732. Epub 2014/01/28. doi: 10.1371/journal.pone.0085732. PubMed PMID: 24465670; PMCID: PMC3897511.

2. Ubhi BK, Riley JH, Shaw PA, Lomas DA, Tal-Singer R, MacNee W, Griffin JL, Connor SC. Metabolic profiling detects biomarkers of protein degradation in COPD patients. Eur Respir J. 2012;40(2):345-55. Epub 2011/12/21. doi: 10.1183/09031936.00112411. PubMed PMID: 22183483.

**Supplemental Figure 1: CONSORT Diagram**

**
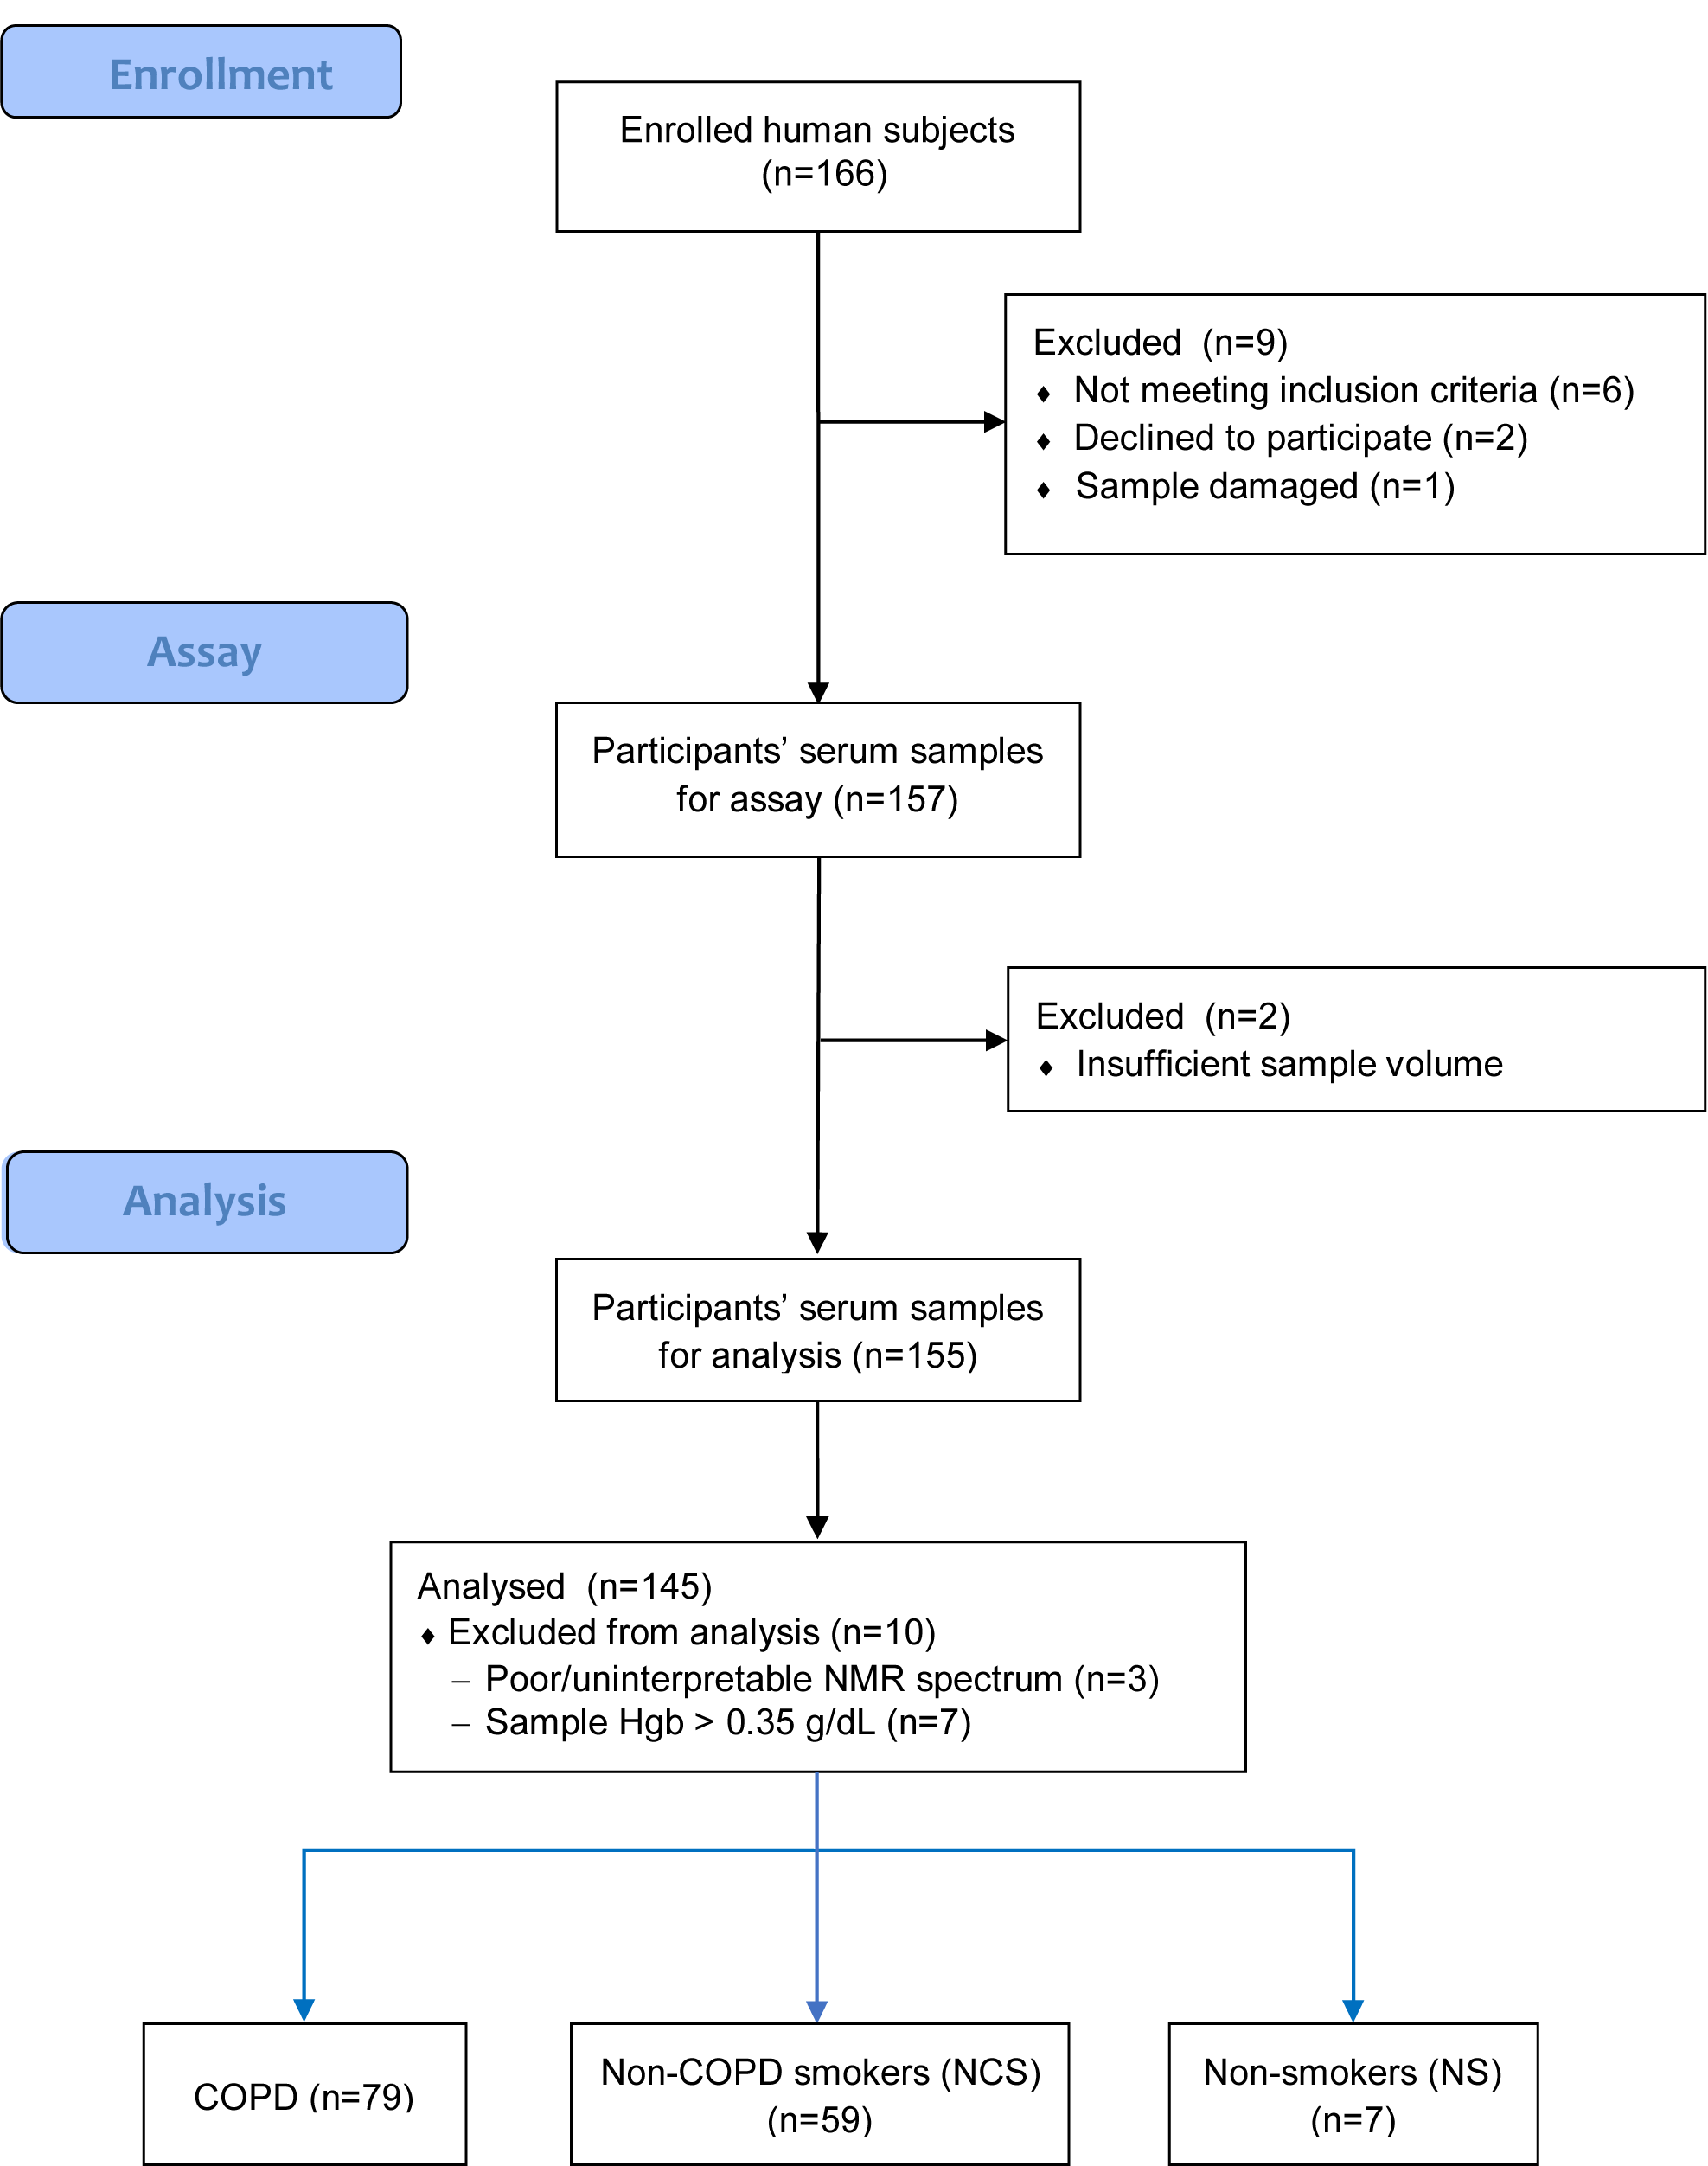
**

**Supplemental Table 1**

Identified and quantified serum metabolites and associated HMDB IDs acquired by 1H-NMR ranked by FDR-corrected p value

| Metabolite | HMDB ID | p value (t-test)  (NCS vs COPD) | FDR  (NCS vs COPD) |
| --- | --- | --- | --- |
| Histidine | HMDB00177 | 0.007 | 0.11 |
| Threonine | HMDB00167 | 0.008 | 0.11 |
| Creatine | HMDB00064 | 0.019 | 0.138 |
| Glycine | HMDB00123 | 0.02 | 0.138 |
| Carnitine | HMDB00062 | 0.029 | 0.164 |
| Leucine | HMDB00687 | 0.036 | 0.17 |
| Valine | HMDB00883 | 0.053 | 0.189 |
| Serine | HMDB00187 | 0.054 | 0.189 |
| Glucose | HMDB00122 | 0.087 | 0.272 |
| Tyrosine | HMDB00158 | 0.141 | 0.371 |
| Lysine | HMDB00182 | 0.146 | 0.371 |
| Proline | HMDB00162 | 0.162 | 0.378 |
| Lactate | HMDB00190 | 0.216 | 0.465 |
| Isoleucine | HMDB00172 | 0.245 | 0.491 |
| Glutamate | HMDB00148 | 0.266 | 0.497 |
| 3-Hydroxybutyrate | HMDB00357 | 0.342 | 0.598 |
| Glutamine | HMDB00641 | 0.396 | 0.64 |
| 2-Hydroxybutyrate | HMDB00008 | 0.42 | 0.64 |
| Betaine | HMDB00043 | 0.445 | 0.64 |
| Citrate | HMDB00094 | 0.457 | 0.64 |
| Ornithine | HMDB00214 | 0.597 | 0.796 |
| Creatinine | HMDB00562 | 0.66 | 0.796 |
| Phenylalanine | HMDB00159 | 0.671 | 0.796 |
| Alanine | HMDB00161 | 0.682 | 0.796 |
| Methionine | HMDB00696 | 0.733 | 0.804 |
| Choline | HMDB00097 | 0.775 | 0.804 |
| Tryptophan | HMDB00929 | 0.776 | 0.804 |
| Acetylcarnitine | HMDB00201 | 0.965 | 0.965 |

HMDB: Human Metabolome Database (http://www.hmdb.ca/)

**Supplemental Figure 2**

Comparison between NCS, GOLD I & II and GOLD III & IV


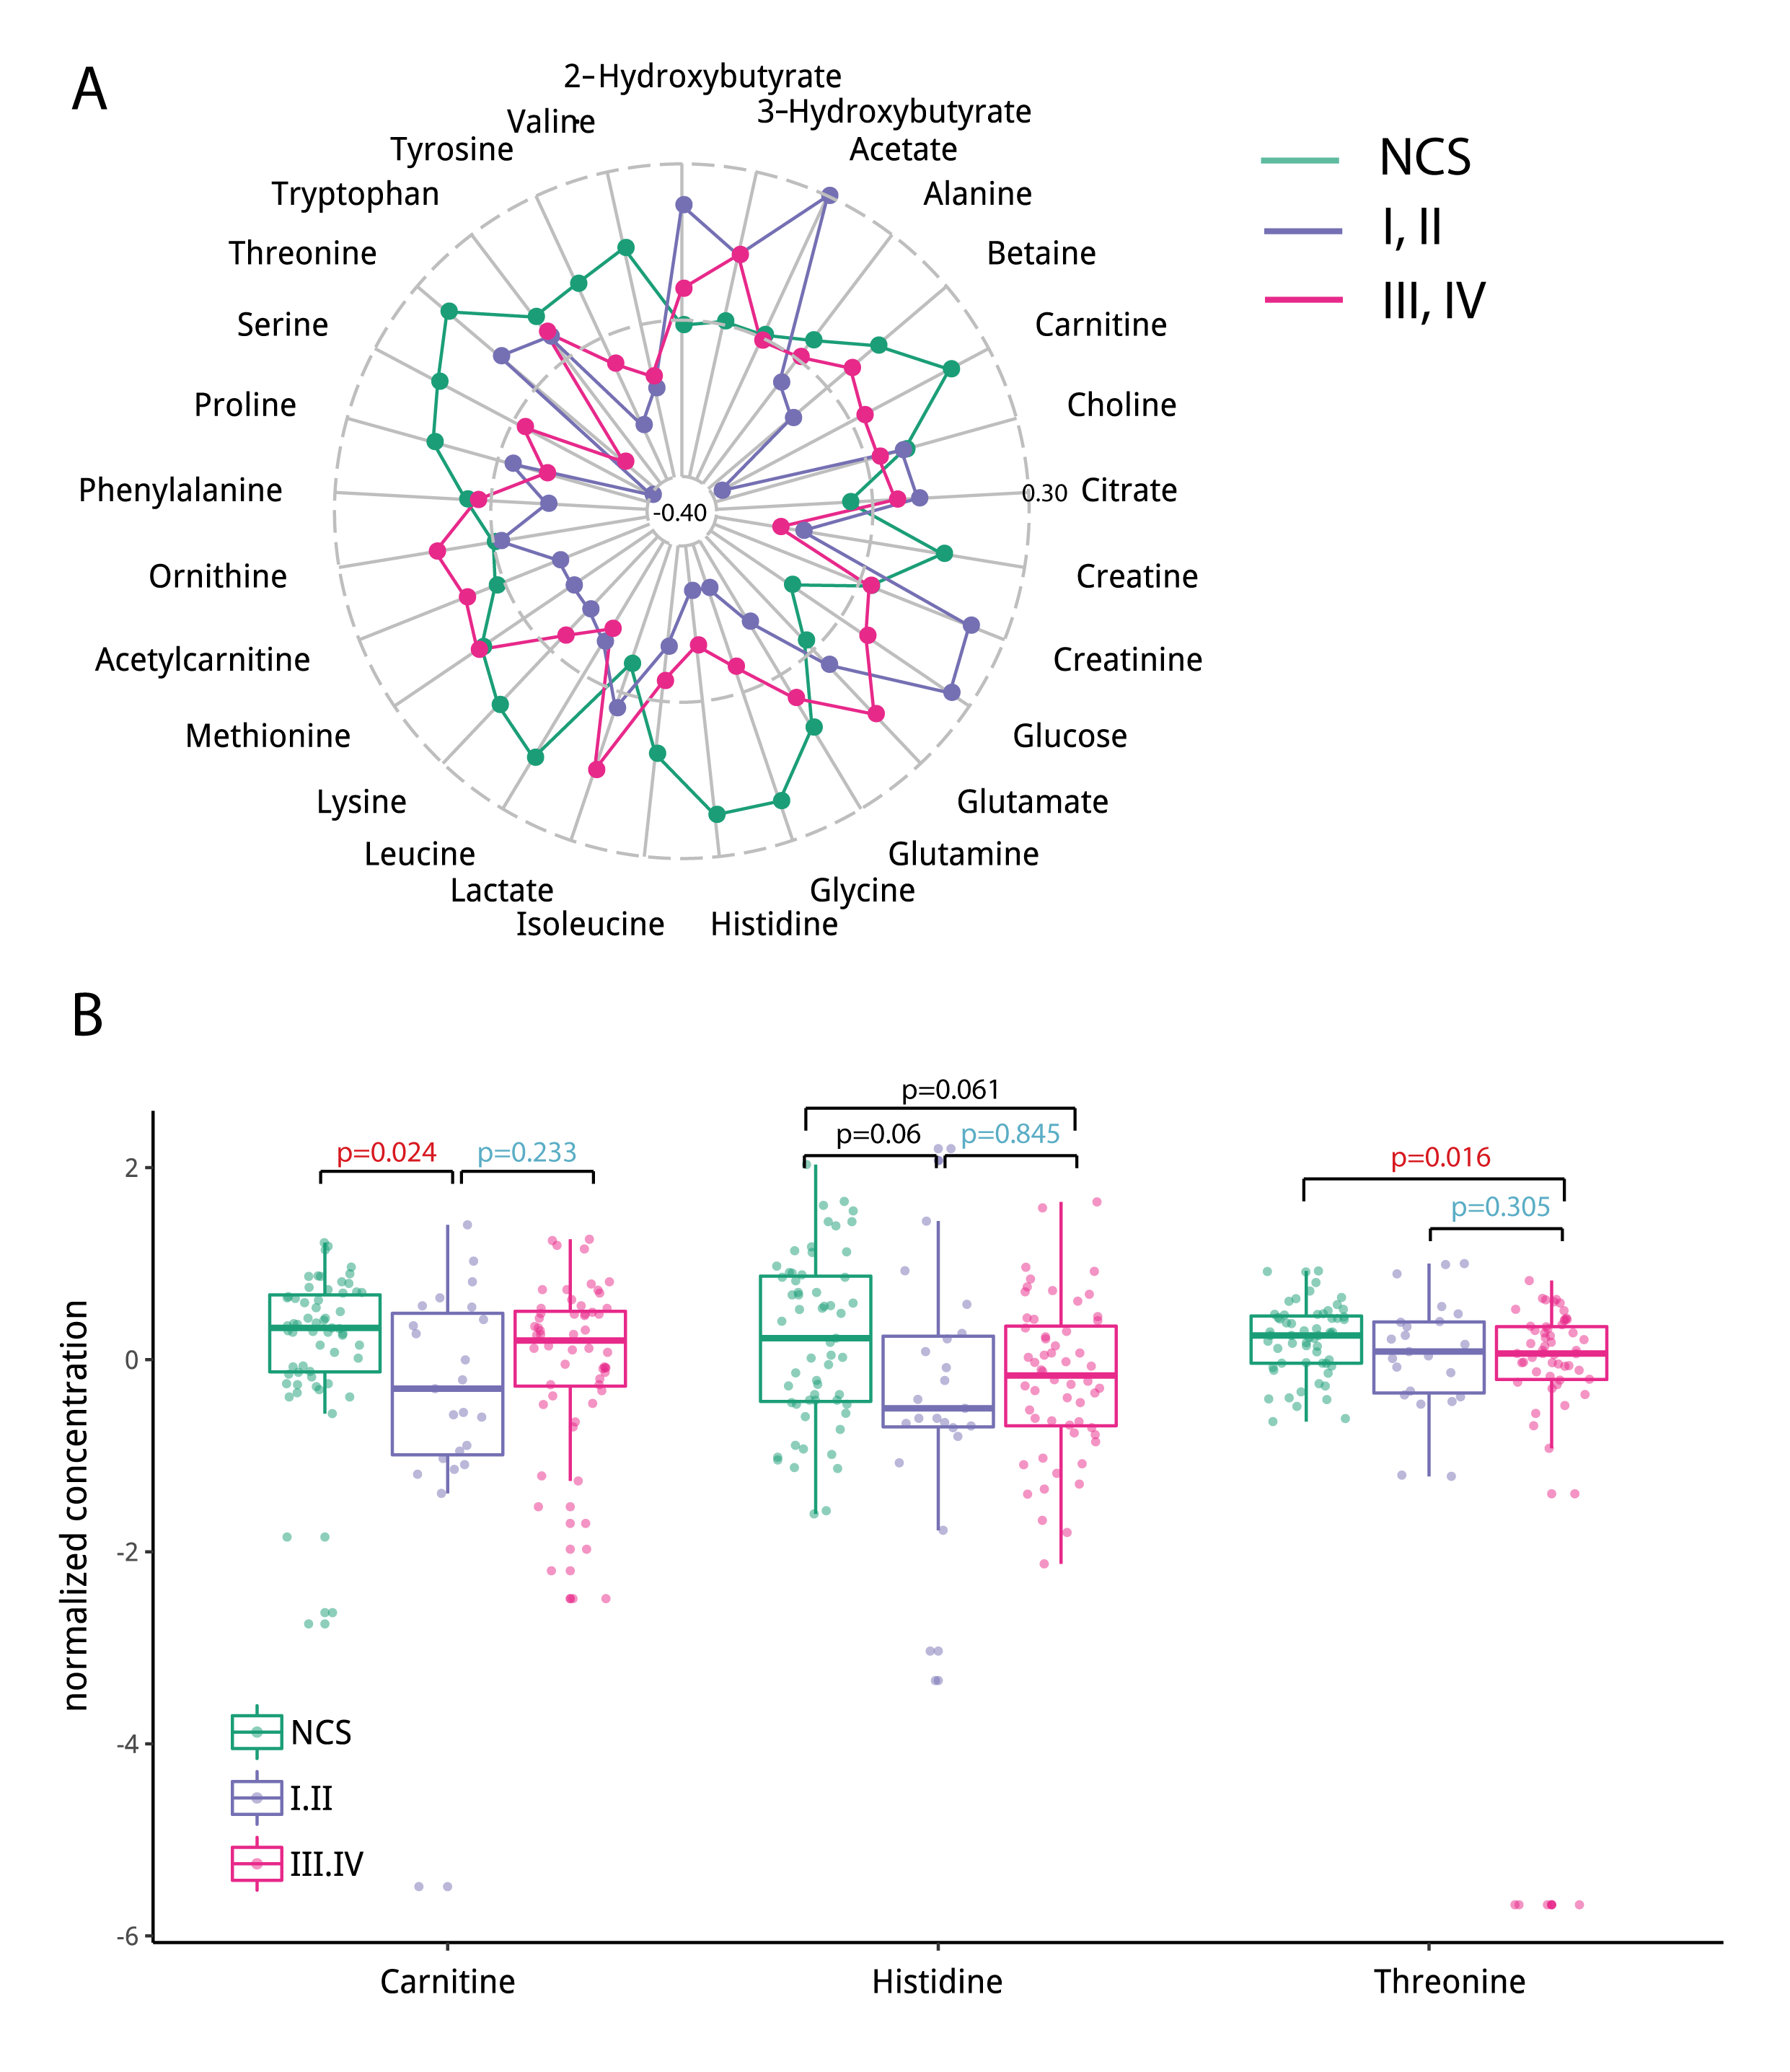


**Figure S2:** (A) Radar plot of normalized serum metabolite concentrations from non-COPD smokers (NCS), COPD GOLD I, II and with GOLD III, IV patients. Centroid and maximal dashed circle separately denote the minimal and maximal mean normalized concentration of all metabolites. (B) Box and whisker plots of normalized metabolite concentrations. Carnitine, histidine and threonine were the most discriminating metabolites（p<0.05）though ANOVA test between the three groups. The Tukey’s post-hoc test p values (shown) were used to determine the differences between groups for each metabolite (e.g., NCS vs GOLD I, II).

**Supplemental Figure 3**

Creatine metabolism, a key energy-related pathway, is reduced in chronic obstructive pulmonary disease


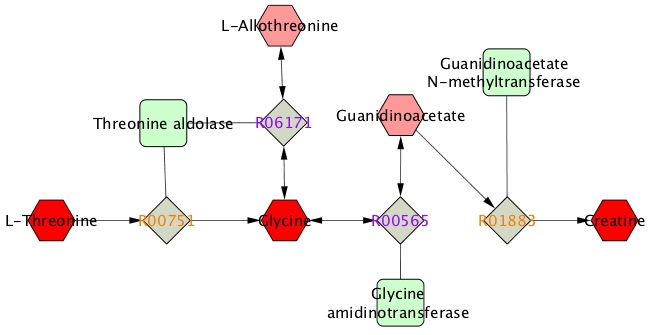


**Figure S3**:Threonine, glycine and creatine metabolism is altered in COPD. Guanidinoacetate and L-allothreonine were not detected in our assay but lower concentrations of guanidinoacetate have been reported in COPD (2). Low-specificity threonine aldolase (EC 4.1.2.48) catalyzes two reactions (R00751 and R06171); glycine amidinotransferase (EC 2.1.4.1) catalyzes R00565 and guanidinoacetate N-methyltransferase (EC 2.1.1.2) catalyzes R01883. The representative pathway was generated in Metscape (<http://metscape.ncibi.org/>) a plugin for Cytoscape (<https://cytoscape.org/>) that relies on the KEGG pathway library. Metabolites are represented by red hexagons (dark red are detected metabolites), green rounded corner squares are enzymes and the associated reactions are depicted as gray diamonds which include the KEGG reaction numbers (https://www.genome.jp/kegg/reaction/).

**Supplemental Figure 4**

The effect of smoking status on serum metabolomics


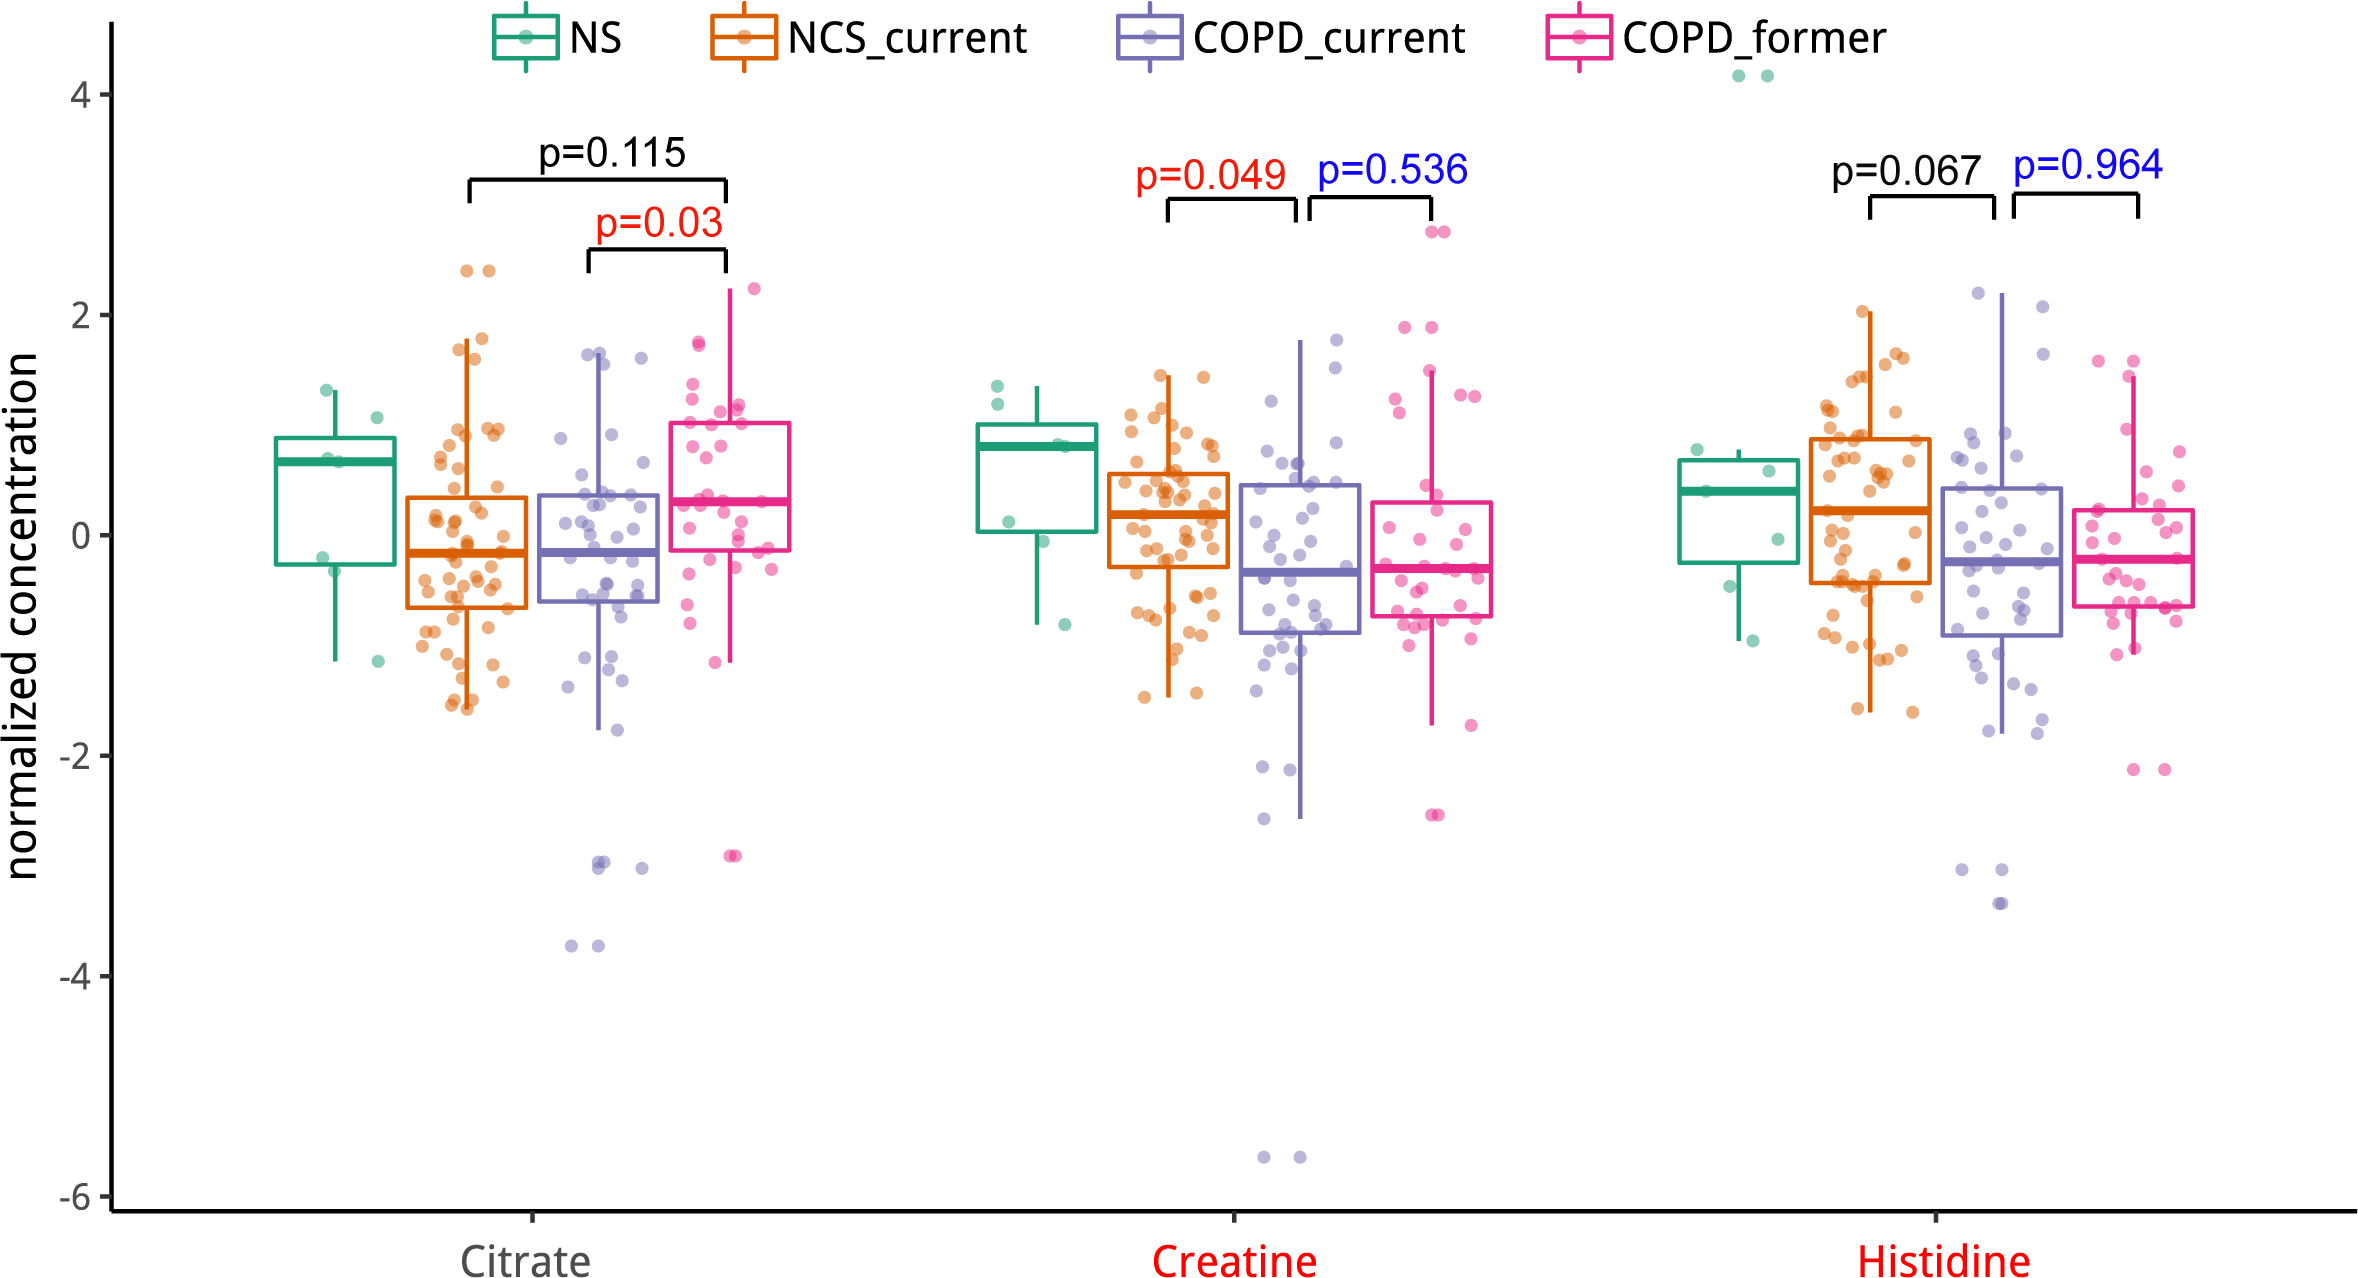


**Figure S4**:Box and whisker plots of normalized serum metabolite concentrations. Citrate, creatine and histidine were statistically different metabolites (p<0.05, ANOVA) in non-smokers (NS; n=7), non-COPD current smokers (NCS; n=59), COPD current smokers (n=43) and COPD former smokers (n=36). Citrate concentration in current smokers with COPD was lower than that in former smokers with COPD. With the exception of citrate, the other metabolite concentrations were not affected by smoking status. The Tukey’s post-hoc test p values (shown) were used to determine the differences between groups for each metabolite (e.g., NS vs NCScurrent).

**Supplemental Figure 5**

The correlation of BMI with serum metabolomics


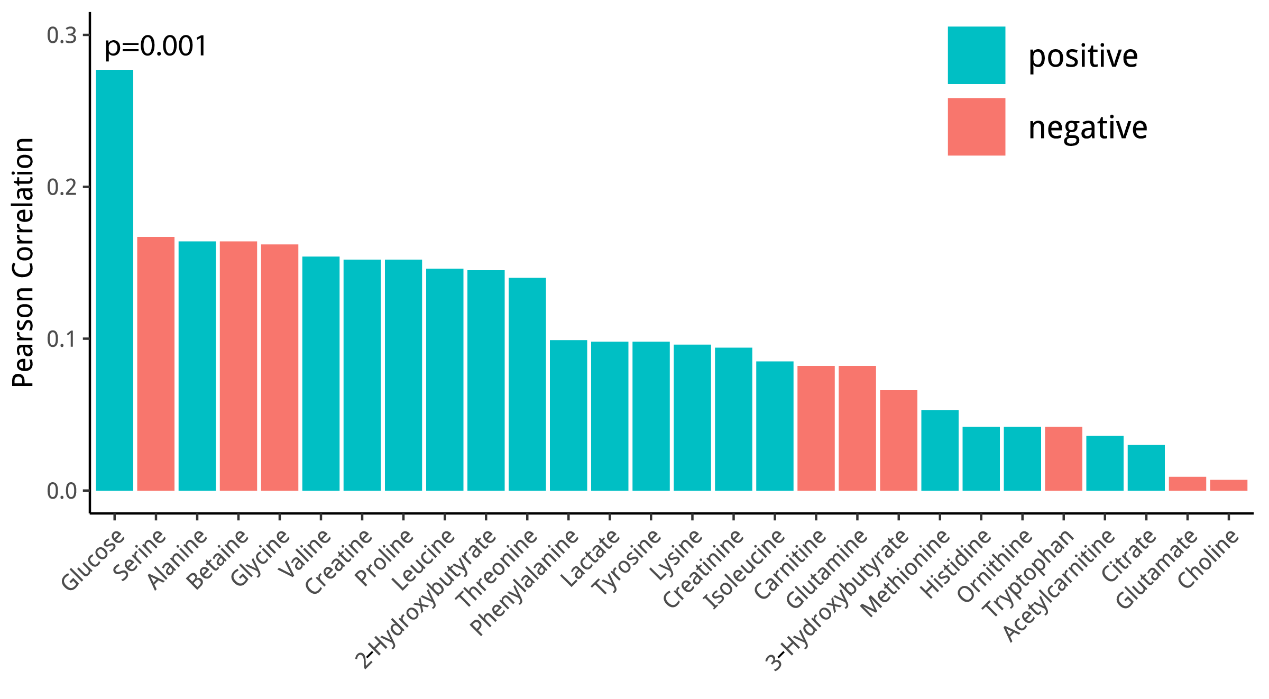


**Figure S5**:Correlation between BMI and serum metabolite concentration. Glucose is the unique metabolite related to BMI (Pearson correlation, p<0.05). Blue and red bar denotes a positive and negative correlation.
